# Supplementary material for: Maternal butyrate supplementation induces insulin resistance associated with enhanced intramuscular fat deposition in the offspring
Source: PubMed Central journal article supplement (PMC5355078; doi:10.18632/oncotarget.14375), 2016-12-30
Supplement: oncotarget-08-13073-s001.pdf [file oncotarget-08-13073-s001.pdf]

## Maternal butyrate supplementation induces insulin resistance associated with enhanced intramuscular fat deposition in the offspring

### SUPPLEMENTARY FIGURE

Control group

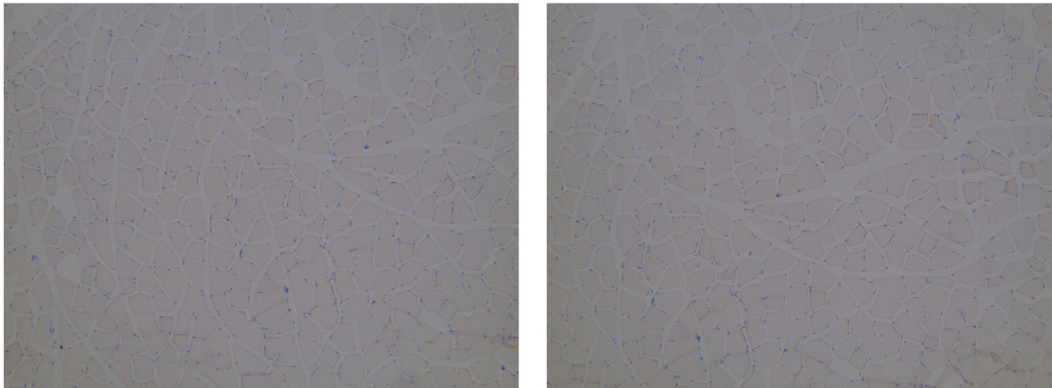

Butyrate group

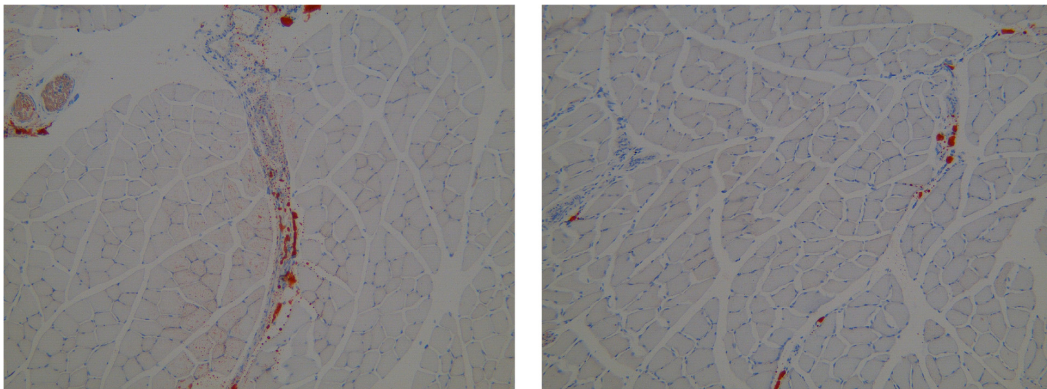

Supplementary Figure 1: Oil red o staining in skeletal muscle of adult offspring.
